- to glucose and insulin concentrations. *Diabetes Care* 2:154–60, 1979
2. Pyörälä K: Relationship of glucose tolerance and plasma insulin to the incidence of coronary heart disease: results from two population studies in Finland. *Diabetes Care* 2:131–41, 1979
  3. Ducimitiere P, Eschwege L, Papoz PL, Claude RJR, Rosselin G: Relationship of plasma insulin levels to the incidence of myocardial infarction and coronary heart disease mortality in a middle-aged population. *Diabetologia* 19:205–10, 1980
  4. Steiner G, Schwartz L, Shumak S, Poapst M: The association of increased levels of intermediate density lipoproteins with smoking and with coronary artery disease. *Circulation* 75:124–30, 1987
  5. Bottiger LE, Carlson LA: Risk factors for ischaemic vascular death for men in the Stockholm Prospective Study. *Atherosclerosis* 36:389–408, 1980
  6. Aberg H, Lithell H, Selinus I, Hedstrand H: Serum triglycerides are a risk factor for myocardial infarction but not for angina pectoralis. *Atherosclerosis* 54:89–97, 1985
  7. Castelli WP: The triglyceride issue: a view from Framingham. *Am Heart J* 112:432–37, 1986
  8. Austin MA: Plasma triglyceride as a risk factor for coronary heart disease: the epidemiologic evidence and beyond. *Am J Epidemiol* 129:249–59, 1989
  9. Steiner G: Atherosclerosis, the major complication of diabetes. In *Comparison of Type I and Type II Diabetes*. Vranic M, Hollenberg CH, Steiner G, Eds. New York, Plenum, 1985, p. 277–97
  10. Fuller JH, McCartney P, Jarrett RJ, Keen H, Rose G, Shipley MJ, Hamilton PJS: Hyperglycemia and coronary heart disease: the Whitehall study. *J Chronic Dis* 32:721–28, 1979
  11. Stamler R, Stamler J (Eds): Asymptomatic hyperglycemia and coronary heart disease, a series of papers by the International Collaborative Group based on studies in fifteen populations. *J Chronic Dis* 32:683–837, 1979
  12. Olefsky JM, Farquhar JW, Reaven GM: Reappraisal of the role of insulin in hypertriglyceridemia. *Am J Med* 57:551–60, 1974
  13. Streja DA, Marlis EB, Steiner G: The effects of prolonged fasting on plasma triglyceride kinetics in man. *Metabolism* 26:505–16, 1977
  14. Kazumi T, Vranic M, Steiner G: Triglyceride kinetics: effects of dietary glucose, sucrose or fructose alone or with hyperinsulinemia. *Am J Physiol* 250:E325–30, 1986
  15. Steiner G, Haynes FJ, Yoshino G, Vranic M: Hyperinsulinemia and in vivo very low density lipoprotein-triglyceride kinetics. *Am J Physiol* 246:E187–92, 1984
  16. Steiner G, Morita S, Vranic M: Resistance to insulin but not to glucagon in lean human hypertriglyceridemics. *Diabetes* 29:899–905, 1980
  17. Steiner G, Vranic M: Insulin and hypertriglyceridemia: a vicious cycle with atherosclerotic potential. *Int J Obes* 6 (Suppl. 1):117–24, 1982
  18. West K: Diagnosis of diabetes mellitus. In *Diabetes Mellitus*. Vol. 5. Rifkin H, Raskin P, Eds. Bowie, MD, Brady, 1982, p. 103–108
  19. Reardon MF, Poapst ME, Steiner G: The independent synthesis of intermediate density lipoproteins in type III hyperlipoproteinemia. *Metabolism* 31:421–27, 1982
  20. Rall SC Jr, Weisgraber KH, Mahley RW: Isolation and characterization of apolipoprotein E. *Methods Enzymol* 128:273–87, 1986
  21. Starr JR, Horwitz DL, Rubenstein AH, Mako ME: *Methods of Hormone Radioimmunoassay*. 2nd ed. New York, Academic, 1979, p. 613–42
  22. Glantz SA: *Primer of Biostatistics*. 2nd ed. New York, McGraw-Hill, 1987
  23. Galvet GD, Blight L, Franklin J, Oliver J, Wise P, Gallus AS: The effects of clofibrate on plasma glucose, lipoproteins, fibrinogen, and other biochemical and hematological variables in patients with nature onset diabetes mellitus. *Eur J Clin Pharmacol* 17:355–62, 1980
  24. Schade DS, Eaton RP, George S, Conway M, Kminsky N, Sivinski J: Metabolic effects of clofibrate in insulin-dependent ketosis-prone diabetic man. *Metabolism* 27:461–68, 1978
  25. Ferrari C, Testori GP, Bertazzoni A, Romussi M, Caldara R, Frezzati S: Increased glucose disappearance rate after short-term clofibrate administration in normal subjects and patients with chemical diabetes. *Horm Metab Res* 10:4–6, 1978
  26. Ratzmann M-L, Rjasanowski I, Bruns W, Ratzmann KP: Effects of clofibrate therapy on glucose tolerance, insulin secretion and serum lipids in subjects with hyperlipoproteinemia and impaired glucose tolerance. *Exp Clin Endocrinol* 82:216–21, 1983
  27. Riccardi G, Genovese S, Saldalamacchia G, Patti L, Marotta G, Postiglione A, Rivellesse A, Capaldo B, Mancini M: Effects of bezafibrate on insulin secretion and peripheral insulin sensitivity in hyperlipidemic patients with and without diabetes. *Atherosclerosis* 75:175–81, 1989

## Relationship Between Cows' Milk Consumption and Incidence of IDDM in Childhood

Knut Dahl-Jørgensen, MD  
Geir Joner, MD  
Kristian F. Hanssen, MD

**Objective:** To compare age-standardized incidence rates of diabetes in children 0–14 yr of age and cows' milk consumption in various countries. **Research Design and Methods:** Ecological correlation study. Only incidence rates from diabetes registries carefully validated by the Diabetes Epidemiology Research International Study

**Group were used—**Finland, Sweden, Norway, Great Britain, Denmark, United States, New Zealand, Netherlands, Canada, France, Israel, and Japan. **Data on fluid cows' milk consumption in corresponding countries were obtained from the International Dairy Federation. Results:** Correlation between milk

consumption and incidence of insulin-dependent diabetes mellitus (IDDM) was 0.96. The data fit a linear regression model, and analysis showed that 94% of the geographic variation in incidence might be explained by differences in milk consumption. Conclusions: The results support the hypothesis that cows' milk may contain a triggering factor for the development of IDDM. *Diabetes Care* 14:1081-83, 1991

Exposure to one or more environmental risk factors seems necessary to convert the HLA-linked genetic susceptibility for insulin-dependent diabetes mellitus (IDDM) into overt disease. Several possible risk factors have been studied: viruses, toxic chemicals, and certain dietary factors, but so far, no convincing evidence exists (1). Studies in BB rats and NOD mice have shown reduced incidence of diabetes associated with milk-free diets (2,3). Furthermore, increased levels of cows' milk antibodies were found in children with newly diagnosed IDDM compared with age-matched nondiabetic control children (4). During the last decade, well-standardized international incidence data for IDDM have become available. We compared the incidence of diabetes in children and cows' milk consumption in different countries in search of a possible triggering factor for diabetes.

## RESEARCH DESIGN AND METHODS

Data on incidence of diabetes in children 0-14 yr of age in various countries between 1978 and 1985 were derived from the Diabetes Epidemiology Research International Study Group (5). Only registries carefully validated by this group to be virtually complete have been included. All registries have documented ascertainment >90% except Israel, where estimates of ascertainment were not available. The following registries were used: Finland, Sweden, Norway, United Kingdom, Denmark, United States (Allegheny County), New Zealand (Canterbury), Netherlands, Canada (Montreal), France, Israel, and Japan (Hokkaido). Data on fluid cows' milk consumption per person in corresponding countries were obtained from the International Dairy Federation (6). Mean consumption between 1977 and 1987 was used for analysis.

## RESULTS

Figure 1 shows the association between the average annual cows' milk consumption per person and the mean annual incidence of IDDM in children 0-14 yr in age. The correlation between milk consumption and the incidence in IDDM was 0.96. The data fit a linear regression model, and analysis showed that 94% of the

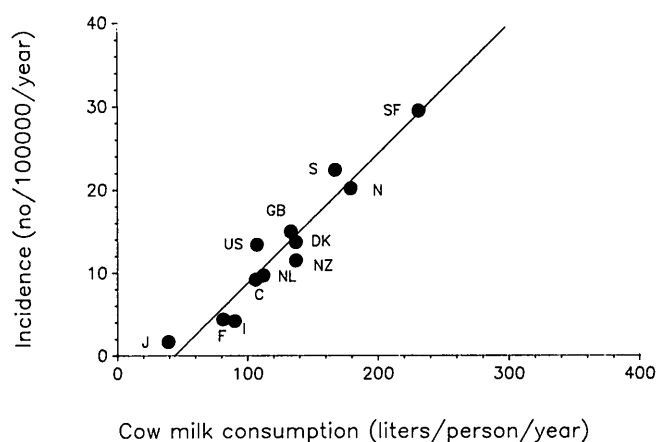

**FIG. 1.** Mean yearly incidence of insulin-dependent diabetes mellitus in children 0-14 yr of age by average fluid cows' milk consumption per person per yr in different countries. J, Japan; F, France; I, Israel; C, Canada; US, United States; NL, Netherlands; NZ, New Zealand; GB, Great Britain; DK, Denmark; N, Norway, S, Sweden; and SF, Finland. Incidence,  $-6.77 + 0.16 \times \text{consumption}$ ,  $R^2 = 0.94$ .

geographic variation in incidence might be explained by differences in milk consumption.

## CONCLUSIONS

The results support the hypothesis that cows' milk may be a triggering factor for the development of IDDM in children. Increased levels of antibodies against cows' milk and  $\beta$ -lactoglobulin were found in newly diagnosed IDDM children in Finland compared with age-matched control children (4). A recent case-control study revealed a shorter duration of breast-feeding and earlier introduction of cows' milk in subsequently diabetic children (7), and a reduction of breast-feeding in Scandinavia was followed by an increased incidence of IDDM 10 yr later (8). Feeding NOD mice, which have an incidence of diabetes >70% 0-30 days of age, with a hypoallergenic infant formula (Pregestimil, Mead Johnson, Evansville, IN) containing casein hydrolysates instead of protein completely prevented diabetes up to 1 yr of age (4). Similar results were reported previously in BB rats (2).

These types of epidemiological studies are at high risk for bias when selecting countries for comparison. We used the incidence data only from registries that had been carefully validated and appeared to be complete, as judged by the Diabetes Epidemiology Research International Group (5). The milk consumption data are based on production and sales figures from well-developed and organized countries reported in a standardized manner to the International Dairy Federation. Unfortunately, no separate data of the consumption in children are available. With older data (1964-1970), Scott (9)

reported a correlation ( $r = 0.86$ ) between consumption of unfermented milk proteins and incidence of diabetes.

Ecological studies such as this really only suggest hypotheses that need to be tested by other study designs. There is a well-established geographical IDDM incidence gradient from north to south, and in addition to differences in milk consumption, there are many other environmental and cultural factors that will distribute in the same way and therefore correlate with IDDM, i.e., a similar study of coffee consumption explained 53% of the geographic variation of IDDM incidence (10). Furthermore, in twins, only 35% are concordant for IDDM, whereas in siblings only 3–5% are concordant for IDDM, and in general, diet within families does not vary much. However, little is known about intrafamilial variability of milk consumption.

Therefore, our findings need to be interpreted with great caution. Cows' milk is an important element of childrens' food, and elimination of milk from the diet may cause more harm than benefit. However, the results may generate further research to define more precisely possible triggering factors for IDDM.

From the Aker Diabetes Research Center, Aker University Hospital, Oslo, Norway.

Address correspondence and reprint requests to Knut Dahl-Jørgensen, MD, Aker Diabetes Research Center, Pediatric Department, Aker University Hospital, N-0514 Oslo 5, Norway.

Received for publication 29 November 1990 and accepted in revised form 15 May 1991.

## REFERENCES

1. Tuomilehto J, Wolf E: Primary prevention of diabetes mellitus. *Diabetes Care* 10:238–48, 1987
2. Elliot RB, Martin JM: Dietary protein: a trigger of insulin-dependent diabetes in the BB rat? *Diabetologia* 26:297–99, 1984
3. Coleman DL, Kuzava JE, Leiter EH: Effect of diet on incidence of diabetes in nonobese diabetic mice. *Diabetes* 39:432–36, 1990
4. Savilahti E, Åkerblom HK, Koskimies S: Children with newly diagnosed insulin dependent diabetes mellitus have increased levels of cows' milk antibodies. *Diabetes Res* 7:137–40, 1988
5. Diabetes Epidemiology Research International Group: Geographic patterns of insulin-dependent diabetes mellitus. *Diabetes* 37:1113–19, 1988
6. *Bull Int Dairy Fed.* Brussels, Belgium, 1977 and 1987
7. Virtanen SM, Räsänen L, Aro A, Lindström J, Tuomilehto J, Åkerblom HK: Infant feeding of Finnish diabetic children diagnosed before the age of 7 years compared to control children (Abstract). *Diabetologia* 33:A197, 1990
8. Borch-Johnsen K, Joner G, Mandrup-Poulsen T, Christy M, Zachau-Christiansen B, Kastrup K, Nerup J: Relationship between breast-feeding and incidence rates of IDDM. *Lancet* 2:1084, 1984
9. Scott FW: Cow milk and insulin-dependent diabetes mellitus: is there a relationship? *Am J Clin Nutr* 51:489–91, 1990
10. Tuomilehto J, Tuomilehto-Wolf E, Virtala E, Laporte R: Coffee consumption as trigger for insulin dependent diabetes in childhood. *Br Med J* 300:642–43, 1990

## Effect of New Oral Antidiabetic Agent CS-045 on Glucose Tolerance and Insulin Secretion in Patients with NIDDM

Yasuhiko Iwamoto, MD  
Takeshi Kuzuya, MD  
Ayako Matsuda, MD  
Takuya Awata, MD  
Shinobu Kumakura, MD  
Gen Inooka, MD  
Ikko Shiraishi, MD

**Objective:** To study the effects of CS-045, a newly developed thiazolidine analogue, on glucose tolerance and insulin response to oral glucose load in patients with non-insulin-dependent diabetes mellitus (NIDDM). **Research Design and Methods:** Nineteen NIDDM patients (mean  $\pm$  SD age  $48.9 \pm 9.4$  yr) whose previous glycemic control on diet and/or sulfonylurea (SU) therapy was judged stable but unsatisfactory ( $>7.8$  mM) were selected for this study. CS-045 (400 mg/day p.o.) was given alone or together with the previous SU drugs for 12 wk. A 75-g oral glucose tolerance test (OGTT) was performed before and after CS-045 treatment. **Results:** The following results were found after CS-045 treatment. 1) Fasting plasma glucose (FPG) and  $HbA_{1c}$  decreased ( $n = 19$ , FPG,  $11.0 \pm 2.4$  vs.  $8.4 \pm 2.7$  mM [before vs. after],  $P < 0.001$ ;  $HbA_{1c}$ ,  $8.0 \pm 1.1$  vs.  $7.4 \pm 1.3\%$ ,  $P < 0.005$ ), and glucose tolerance markedly improved. 2) Fasting insulin (immunoreactive insulin [IRI]) and insulin response during OGTT decreased ( $n = 19$ ,

fasting IRI,  $77.4 \pm 49.8$  vs.  $56.5 \pm 24.6$  pM [before vs. after],  $P < 0.05$ ; area under the curve of IRI,  $540.3 \pm 350.5$  vs.  $426.4 \pm 216.3$  pM  $\cdot$  h,  $P < 0.05$ ). **Conclusions:** CS-045 is effective in improving glucose tolerance without stimulation of insulin secretion in NIDDM, suggesting an effect in improving insulin sensitivity. *Diabetes Care* 14:1083–86, 1991

A newly developed antidiabetic agent, ( $\pm$ )-5-[4-(6-hydroxy-2,5,7,8-tetramethylchroman-2-ylmethoxy)benzyl]-2,4-thiazolidinedione (CS-045), exhibited an antihyperglycemic effect in various animal models of insulin-resistant non-insulin-dependent diabetes mellitus (NIDDM) (1,2). Previous studies in animals revealed that CS-045 increases insulin
